# Supplementary material
Source: Research Square preprint supplement (doi:10.21203/rs.3.rs-9122105/v1)
Supplement: Supplementary file 2 [file fd5af4378b7265323a6f0a5a.docx]

**Supplementary File 2 Study selection + data extraction forms**

**Table S2a: Study Selection Form**

| Study information | Study ID |  |  |  |
| --- | --- | --- | --- | --- |
| Author |  |  |  |
| Year |  |  |  |
| Title |  |  |  |
| Inclusion Criteria  (Y/N) | Is the study either qualitative or mixed methods (containing qualitative elements)? |  |  |  |
| Is the study collecting a sample from underserved populations? |  |  |  |
| Are the GPs in primary care? |  |  |  |
| Is the study either qualitative or mixed methods (containing qualitative element)? |  |  |  |
| Does the study report experiences of health coaching from underserved populations |  |  |  |
| Exclusion Criteria  (Y/N) | Does the study not contain qualitative elements? |  |  |  |
| Are they from a population that is not otherwise defined as underserved ? |  |  |  |
|  |  |  |  |
| Does the study not explore the experience of health coaching? |  |  |  |
|  | Include or exclude |  |  |  |
| Reason for exclusion |  |  |  |

**Table S2b: Data extraction form**

| **Study information** | Study ID |  |  |  |
| --- | --- | --- | --- | --- |
| Author |  |  |  |
| Year |  |  |  |
| Title |  |  |  |
| **Study characteristics** | Country of study |  |  |  |
| Setting |  |  |  |
| Participant interview or free text survey |  |  |  |
| Sample number in the study |  |  |  |
| Data collection method? |  |  |  |
| Specific focus of Health and wellbeing coaching? |  |  |  |
| Study analysis method |  |  |  |
| Underserved populations perspectives? |  |  |  |
| **Aims** | Study aims /purpose |  |  |  |
| **Study outputs** | Main themes |  |  |  |
| Recommendation/application |  |  |  |
